# Supplementary material
Source: Springer Nature journal article supplement (https://www.springermedizin.de/resource/supplementary/12916_2011_511_MOESM6_ESM.pdf/9598130)

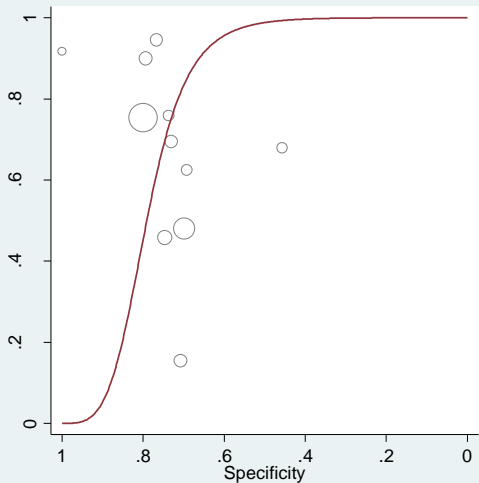

a) Circles weighted according to study precision

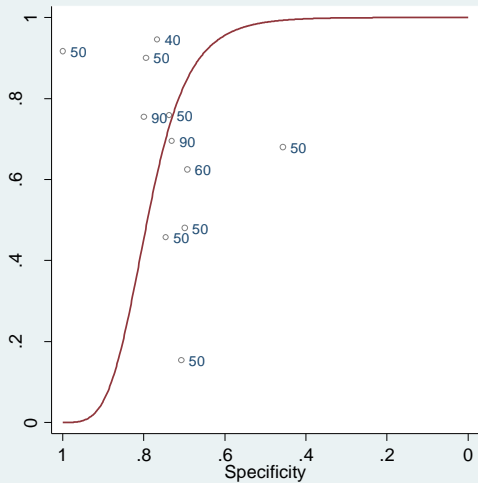

b) Marker points showing threshold (mg/dl)

Supplement: MOESM6 [file 9598130]
